# Supplementary material for: Cysteine-assisted overgrowth of gold nanorods to prepare highly branched gold nanoantennas with tunable morphological and plasmonic properties
Source: Royal Society of Chemistry journal article supplement (doi:10.1039/d3ce00685a), 2023-01-01
Supplement: d3ce00685a1.pdf [file d3ce00685a1.pdf]

## SUPPORTING INFORMATION

### **Cysteine-assisted Overgrowth of Gold Nanorods to Prepare Highly Branched Gold Nanoantennas with Tunable Morphological and Plasmonic Properties**

*Cuixia Bi,<sup>\*a</sup> Zhixiu Wang,<sup>b</sup> Hongyan Zhao<sup>a</sup> and Guangqiang Liu<sup>\*a</sup>*

<sup>a</sup>School of Physics and Physical Engineering, Qufu Normal University, Qufu, 273165, P. R. China

<sup>b</sup>Administrative Office of Laboratory and Equipment, Qufu Normal University, Qufu 273165, P. R.

China

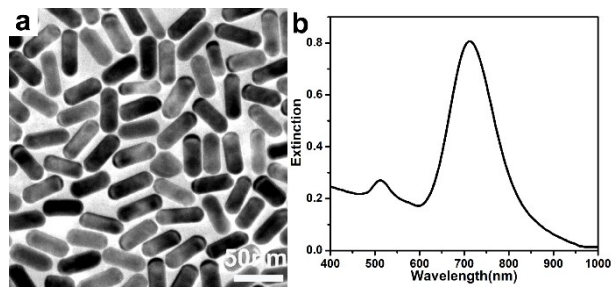

**Figure S1.** TEM images (a) and Extinction spectra (b) of Au NRs.

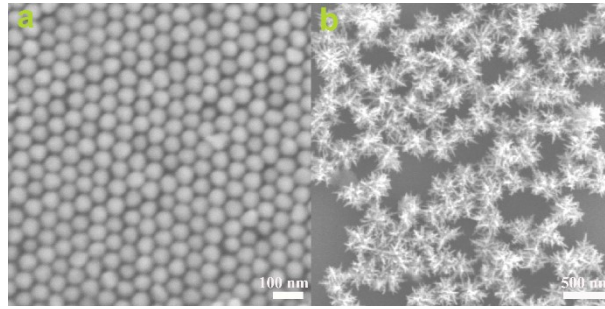

**Figure S2.** SEM images of 50 nm Au nanosphere (a) and Au nanostars synthesized by using 50 nm Au nanosphere as seeds. The concentrations of CTAC,  $\text{HAuCl}_4$ , AA and cysteine in the growth solution are 15 mM and 0.18 mM, 9 mM, and 0.93  $\mu\text{M}$ , respectively.

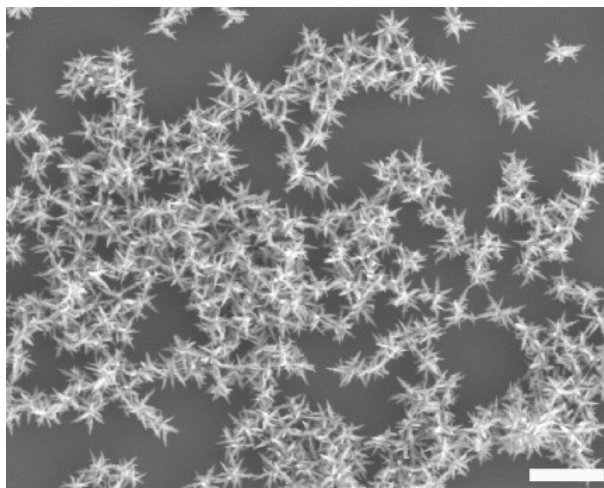

**Figure S3.** SEM image of AuNPs synthesized at 5  $\mu\text{L}$  volume of as-prepared Au NR solutions in the growth solution. Scale bar is 500 nm.

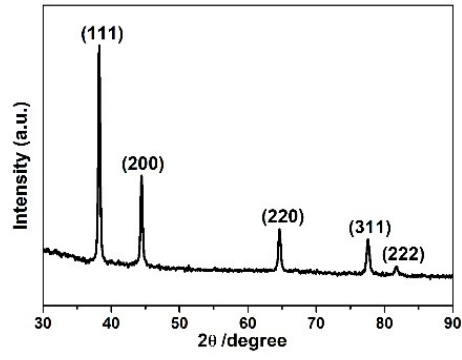

**Figure S4.** The XRD pattern of the Au nanoantennas.

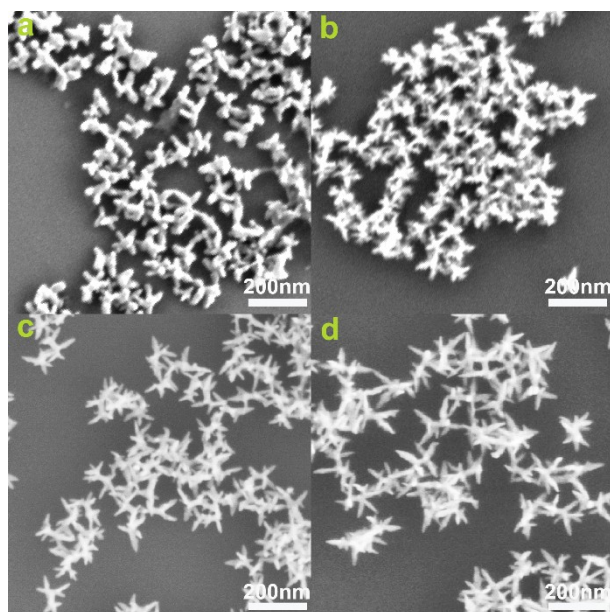

**Figure S5.** SEM images (a to d) of Au NPs synthesized at different AA concentrations: 1.1 (a), 2.2 (b), 4.5 (c), and 9.0 mM (d). The volume of as-prepared Au NRs solutions in the growth solution is 60  $\mu$ L. The concentrations of CTAC, HAuCl<sub>4</sub>, and cysteine in the growth solution are 15 mM and 0.18 mM, and 0.93  $\mu$ M, respectively.

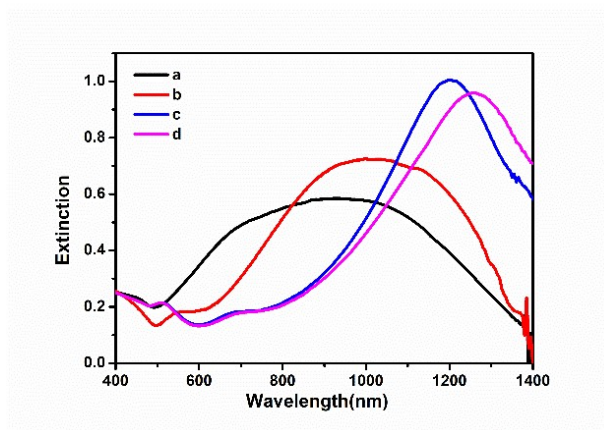

**Figure S6.** UV-vis-NIR spectra of Au NPs synthesized at different AA concentrations.

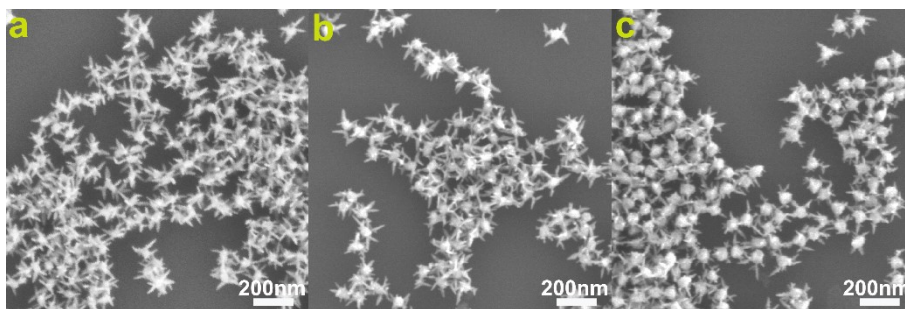

**Figure S7.** SEM images (a to c) of AuNPs synthesized at different  $\text{AgNO}_3$  concentrations: 2.0 (a), 6.0 (b), and 12.0  $\mu\text{M}$  (c). The volume of Au NR solutions in the growth solution is 60  $\mu\text{L}$ . The concentrations of CTAC,  $\text{HAuCl}_4$ , AA, and cysteine in the growth solution are 15 mM and 0.18 mM, 9 mM, and 0.93  $\mu\text{M}$ , respectively.



**Table S1. Morphological characteristics and extinction peak positions of Au nanoantennas (sample shown in Figure 1) obtained at different concentrations of cysteine in the growth solution.**

| <b>Samples</b> | <b>Branch Length /nm</b> | <b>Branch Diameter /nm</b> | <b>Branch Aspect ratio</b> | <b>Average numbers of branches</b> | <b><math>\lambda_{\max}</math> (nm)</b> |
|----------------|--------------------------|----------------------------|----------------------------|------------------------------------|-----------------------------------------|
| <b>a</b>       | 73.7 ± 10                | 42.3 ± 5                   | 1.7                        | /                                  | 704                                     |
| <b>b</b>       | 58.4 ± 10                | 27.8 ± 5                   | 2.1                        | 4                                  | 975                                     |
| <b>c</b>       | 63.8 ± 10                | 21.8 ± 5                   | 2.9                        | 6-7                                | 1200                                    |
| <b>d</b>       | 67.0 ± 10                | 18.9 ± 5                   | 3.5                        | 8-10                               | 1375                                    |

**Table S2. Morphological characteristics and extinction peak positions of Au nanoantennas (sample shown in Figure 2) obtained at different volume of as-prepared Au NRs solutions in the growth solution.**

| <b>Samples</b> | <b>Branch Length /nm</b> | <b>Branch Diameter /nm</b> | <b>Branch Aspect ratio</b> | <b>Average numbers of branches</b> | <b><math>\lambda_{\max}</math> (nm)</b> |
|----------------|--------------------------|----------------------------|----------------------------|------------------------------------|-----------------------------------------|
| <b>a</b>       | /                        | /                          | /                          | 0                                  | 728                                     |
| <b>b</b>       | 24.3 ± 10                | 13.5 ± 5                   | 1.8                        | 2                                  | 965                                     |
| <b>c</b>       | 37.5 ± 10                | 16.3 ± 5                   | 2.3                        | 4                                  | 1145                                    |
| <b>d</b>       | 48.7 ± 10                | 18.0 ± 5                   | 2.7                        | 6                                  | 1200                                    |
| <b>e</b>       | 72.4 ± 10                | 20.1 ± 5                   | 3.6                        | 8                                  | 1340                                    |
| <b>f</b>       | 105.5 ± 10               | 26.2 ± 5                   | 4.0                        | 10                                 | >1400                                   |

**Table S3. Morphological Characteristics and Extinction Peak Positions of Au nanoantennas (sample shown in Figure 4) obtained at different concentrations of HAuCl<sub>4</sub> in the growth solution.**

| <b>Samples</b> | <b>Branch Length<br/>/nm</b> | <b>Branch Diameter<br/>/nm</b> | <b>Branch Aspect<br/>ratio</b> | <b><math>\lambda_{\max}</math> (nm)</b> |
|----------------|------------------------------|--------------------------------|--------------------------------|-----------------------------------------|
| <b>a</b>       | 48.5 ± 10                    | 14.0 ± 5                       | 3.5                            | 1320                                    |
| <b>b</b>       | 63.8 ± 10                    | 21.8 ± 5                       | 2.9                            | 1200                                    |
| <b>c</b>       | 77.2 ± 10                    | 30.7 ± 5                       | 2.5                            | 1140                                    |
| <b>d</b>       | 94.3 ± 10                    | 43.9 ± 5                       | 2.1                            | 850                                     |
